# Supplementary material for: BD-IES Observation of Multi-Period Electron Flux Modulation Caused by Localized Ultra-Low Frequency Waves
Source: Copernicus journal article supplement (doi:10.5194/angeo-2019-139), 2019-09-27
Supplement: Supplementary file 1 [file angeo-2019-139-supplement.pdf]

**Supplementary Materials for “BD-IES  
Observation of Multi-Period Electron Flux  
Modulation Caused by Localized Ultra-Low  
Frequency Waves”**

Xingran Chen<sup>1</sup>, Qiugang Zong<sup>1\*</sup>, Xuzhi Zhou<sup>1</sup>, Hong Zou<sup>1\*</sup>, Li  
Li<sup>1</sup>, Yixin Hao<sup>1</sup>, and Yongfu Wang<sup>1</sup>

<sup>1</sup> Institute of Space Physics and Applied Technology, School of  
Earth and Space Sciences, Peking University, Beijing, China

Corresponding authors:

ZONG Qiugang, qgzong@pku.edu.cn

ZOU Hong, hongzou@pku.edu.cn

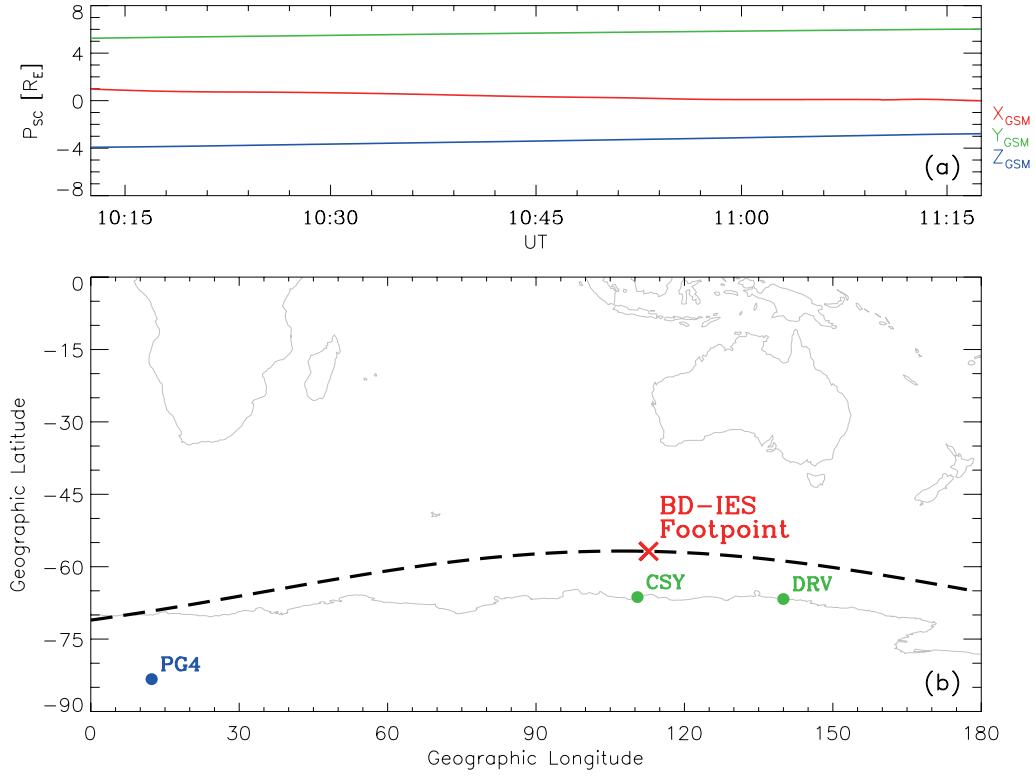

Figure 1: Locations of the spacecraft and the ground-based geomagnetic observatories. (a) Spacecraft position in GSM coordinates. (b) Footpoint of the spacecraft and locations of the three ground-based magnetometers. The black dashed line shows the isopleth of the geomagnetic latitude equivalent to the spacecraft footpoint. The two stations near the spacecraft footpoint, marked by the green dots, did not observe ULF oscillations while the station away from the footpoint, marked by the blue dot, observed ULF oscillations in the relevant periods (shown in Figure ), which supports the idea that the ULF waves in our event was azimuthally confined and the spacecraft was located outside of wave active region.

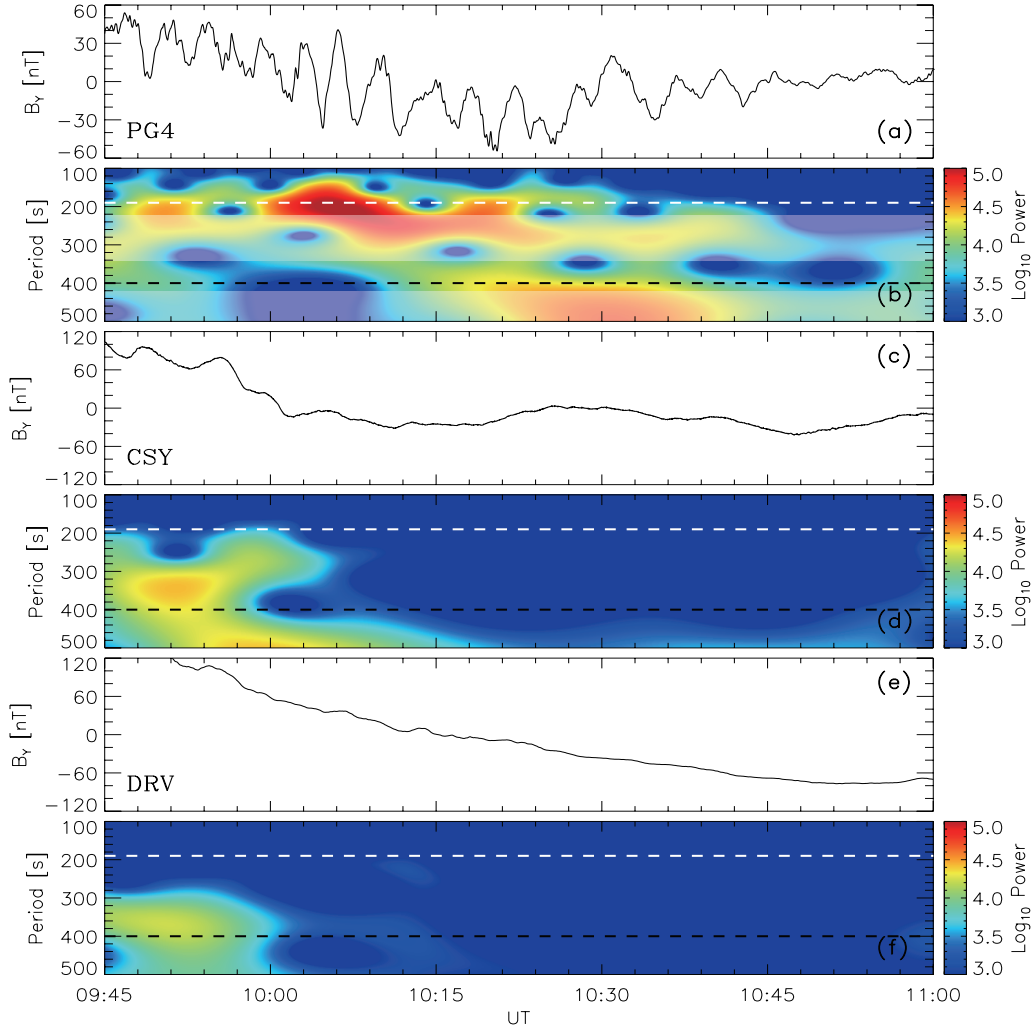

Figure 2: Ground-based magnetic field observations. (a)(c)(e) The east-west component of magnetic field observed at PG4, CSY, and DRV ground-based magnetometer stations. (b)(d)(f) The corresponding wavelet power spectrogram. The horizontal dashed lines mark the periods of 190 s and 400 s. The two stations near the spacecraft footprint, CSY and DRV, did not observe ULF perturbation, while oscillations in the Pc 3-5 band was apparently observed by PG4 away from the footprint in the azimuthal direction. Since the position of PG4 mapped to a higher L shell, the eigen-frequency of the corresponding field lines are usually lower (e.g. Southwood, 1974; Kivelson and Southwood, 1985). Therefore, the magnetic field oscillations possibly associated with the wave-particle interactions might be observed at longer periods, which are shaded in panel (b).

## References

Kivelson, M. G. and Southwood, D. J.: Resonant ULF waves: A new interpretation, *Geophys. Res. Lett.*, 12, 49-52, doi:10.1029/GL012i001p00049, 1985.

Southwood, D. J.: Some features of field line resonances in the magnetosphere, *Planet. Space Sci.*, 22(3), 483-491, 1974.
